# Supplementary material for: Soil Nutrient Status and Morphometric Responses of Guava under Drip Irrigation and High-Tech Horticultural Techniques for Sustainable Farming
Source: MDPI journal article supplement (doi:10.3390/hydrology9090151), 2022-08-23
Supplement: s1 [file s1]

# Supplementary file

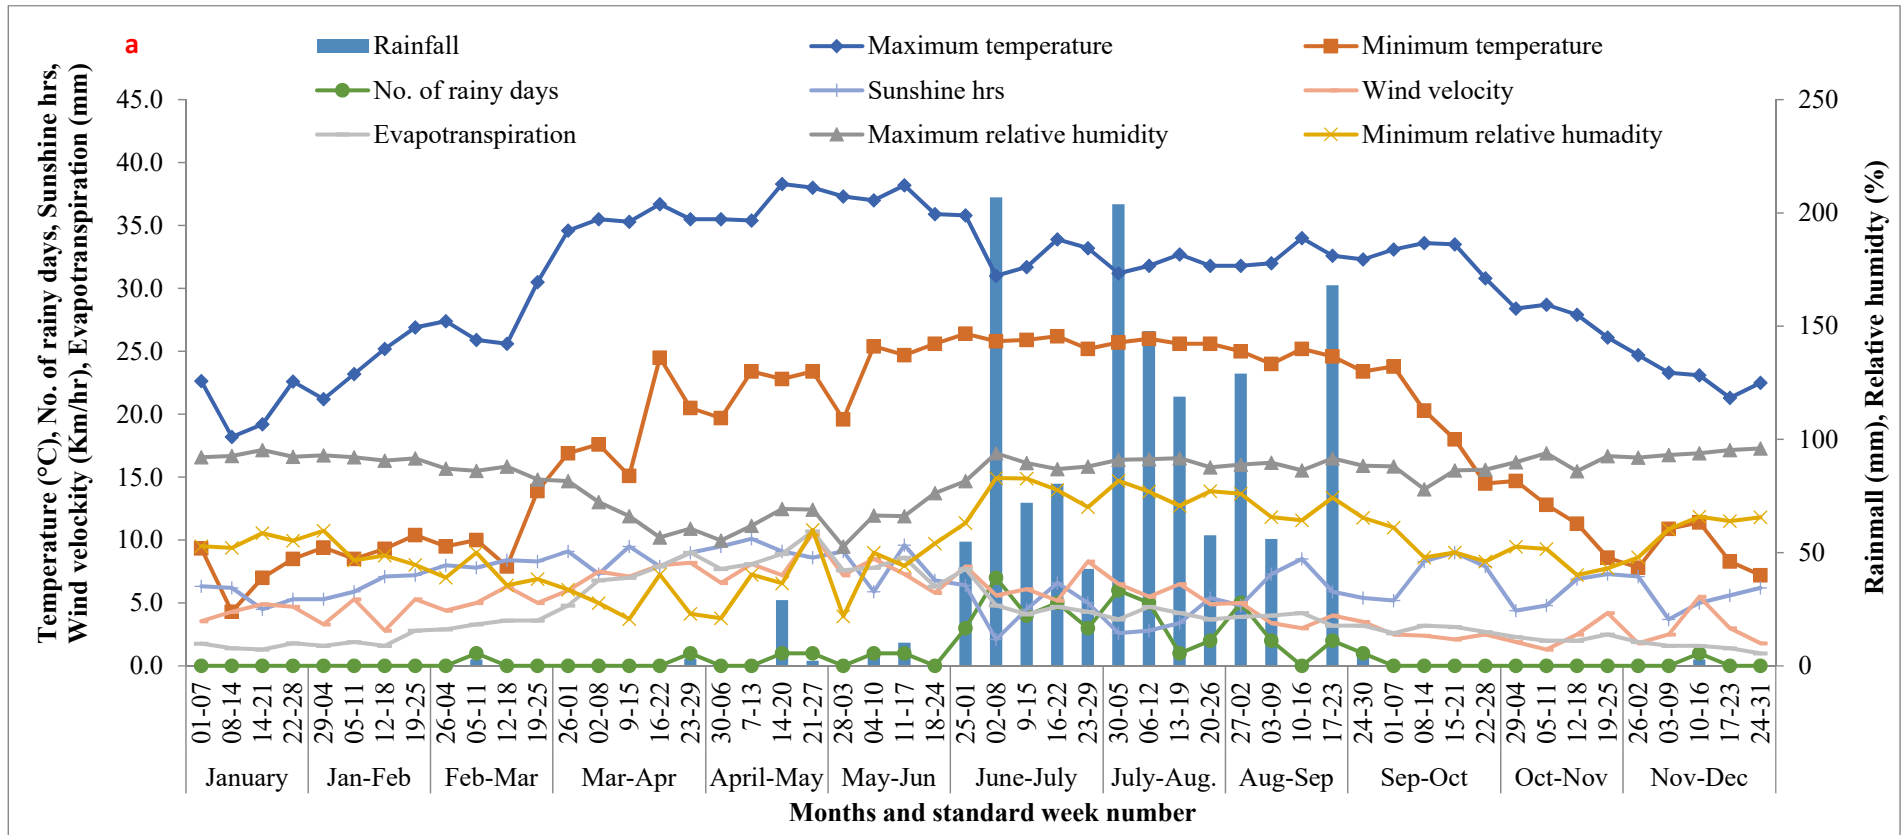

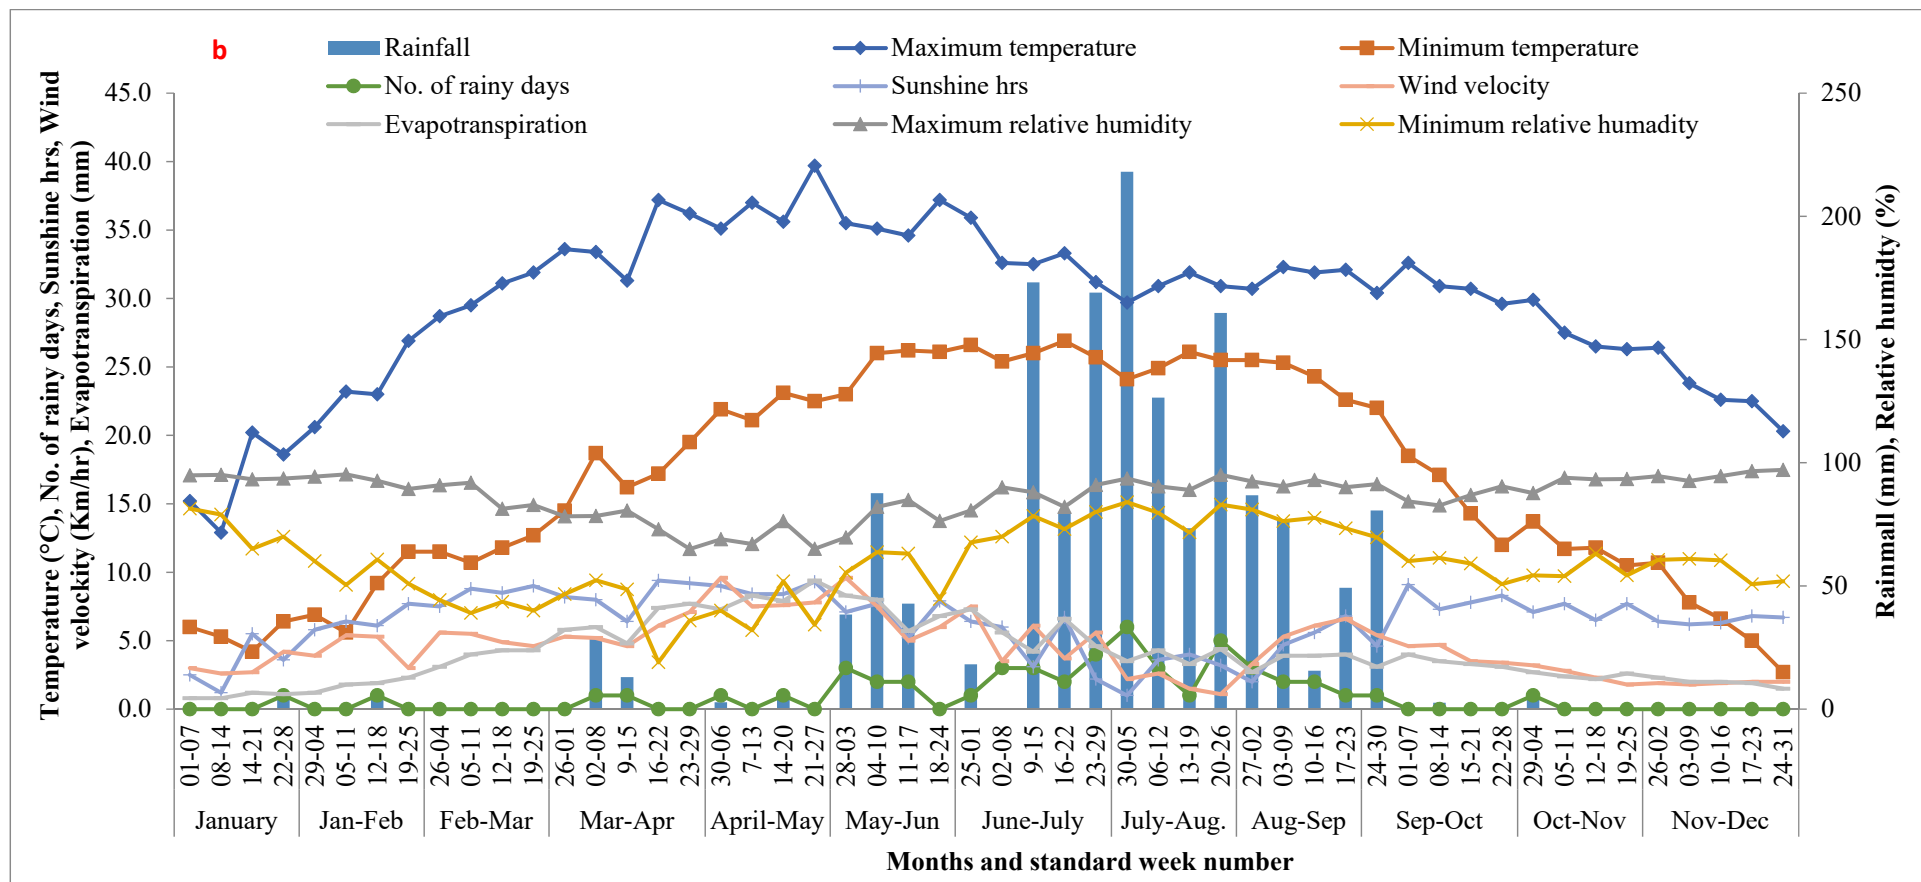

**Figure S1: Weekly meteorological weather data for experimental year (a) 2017 and (b) 2018**

**Table S1: Physical and chemical attributes of soil before the execution of experiment**

| S. No. | Soil particulars             | Values     |
|--------|------------------------------|------------|
| 1      | Soil texture                 | Silty loam |
| 2      | pH                           | 6.17       |
| 3      | EC (dSm <sup>-1</sup> )      | 0.19       |
| 4      | Organic carbon (%)           | 0.74       |
| 5      | Available nitrogen (kg/ha)   | 203.25     |
| 6      | Available phosphorus (kg/ha) | 54.35      |
| 7      | Available potassium (kg/ha)  | 232.64     |

**Table S2: Data for correlation studies (n=76)**

| Yield | Dehydrogenase | Available N | Available P | Available K | SOC   | Canopy Volume | Leaf Area | No of Flowers |
|-------|---------------|-------------|-------------|-------------|-------|---------------|-----------|---------------|
| 44.13 | 256.58        | 185.49      | 39.46       | 234.26      | 77.50 | 31.54         | 70.46     | 34.60         |
| 45.48 | 314.44        | 219.24      | 55.79       | 252.06      | 74.50 | 37.99         | 75.71     | 38.26         |
| 41.34 | 226.97        | 178.07      | 35.94       | 223.68      | 75.50 | 27.96         | 67.66     | 29.80         |
| 53.45 | 374.26        | 241.62      | 63.17       | 259.42      | 78.50 | 38.84         | 80.46     | 43.96         |
| 46.75 | 337.81        | 216.50      | 59.91       | 253.91      | 76.25 | 40.17         | 77.99     | 37.80         |
| 43.20 | 280.09        | 189.08      | 40.83       | 236.70      | 75.25 | 26.85         | 73.65     | 34.34         |
| 45.67 | 299.95        | 216.50      | 52.49       | 248.51      | 76.25 | 36.91         | 73.44     | 38.12         |
| 41.29 | 237.05        | 182.67      | 38.26       | 227.68      | 75.25 | 26.28         | 67.85     | 29.48         |
| 38.82 | 282.14        | 175.74      | 33.64       | 200.94      | 73.25 | 21.22         | 65.94     | 30.65         |
| 44.88 | 183.14        | 190.03      | 46.28       | 246.72      | 77.90 | 37.09         | 70.98     | 39.46         |
| 40.73 | 217.62        | 179.97      | 35.31       | 208.09      | 79.90 | 31.84         | 69.98     | 32.69         |
| 38.37 | 288.14        | 172.50      | 31.79       | 187.45      | 75.90 | 20.99         | 64.30     | 27.85         |
| 44.55 | 195.92        | 189.68      | 43.08       | 238.78      | 78.90 | 32.73         | 67.98     | 35.04         |
| 39.54 | 180.05        | 174.69      | 32.60       | 196.97      | 77.90 | 21.85         | 65.85     | 28.08         |
| 37.66 | 169.47        | 168.83      | 31.26       | 184.71      | 80.90 | 20.73         | 64.80     | 24.50         |
| 42.12 | 191.38        | 181.35      | 39.17       | 229.63      | 76.90 | 32.76         | 66.25     | 34.00         |
| 40.20 | 240.96        | 170.67      | 31.47       | 191.25      | 75.90 | 22.55         | 66.39     | 29.00         |
| 37.76 | 174.26        | 165.58      | 30.19       | 181.17      | 78.90 | 19.88         | 62.27     | 25.14         |
| 36.97 | 167.74        | 157.07      | 27.35       | 160.30      | 78.40 | 11.84         | 62.20     | 27.21         |
| 41.78 | 262.91        | 191.01      | 45.39       | 218.36      | 75.50 | 27.41         | 71.41     | 34.66         |
| 46.29 | 324.5         | 235.68      | 61.92       | 238.21      | 77.50 | 34.73         | 72.55     | 41.70         |
| 41.19 | 235.24        | 186.57      | 41.38       | 210.76      | 73.50 | 26.92         | 66.56     | 31.50         |
| 52.95 | 383.36        | 254.13      | 59.97       | 253.35      | 77.50 | 44.70         | 79.88     | 41.57         |
| 45.86 | 353.41        | 221.87      | 64.09       | 258.05      | 74.25 | 43.55         | 78.18     | 39.20         |
| 42.98 | 267.08        | 180.03      | 47.02       | 226.17      | 78.25 | 28.02         | 69.64     | 33.04         |
| 45.89 | 312.42        | 221.87      | 57.58       | 239.74      | 73.25 | 34.50         | 74.52     | 39.74         |
| 40.64 | 218.13        | 164.46      | 43.21       | 232.70      | 77.25 | 30.45         | 68.80     | 35.10         |
| 40.85 | 286.07        | 183.84      | 35.93       | 187.00      | 78.25 | 28.41         | 70.51     | 29.19         |
| 44.32 | 177.11        | 207.64      | 44.41       | 233.85      | 82.90 | 33.10         | 72.86     | 37.16         |
| 40.40 | 217.67        | 167.83      | 40.44       | 201.87      | 78.90 | 26.44         | 68.27     | 28.79         |
| 38.18 | 285.89        | 189.83      | 33.46       | 193.13      | 73.90 | 24.98         | 67.55     | 27.09         |
| 43.42 | 211.16        | 207.29      | 37.64       | 242.39      | 77.90 | 27.03         | 71.81     | 35.85         |
| 38.71 | 191.59        | 181.62      | 26.77       | 190.71      | 74.90 | 28.97         | 65.73     | 28.75         |
| 38.89 | 168.7         | 158.19      | 35.97       | 176.67      | 78.90 | 23.80         | 64.75     | 26.65         |
| 40.70 | 182.46        | 167.82      | 46.81       | 216.79      | 74.90 | 26.08         | 69.53     | 31.25         |

|       |        |        |       |        |       |       |       |       |
|-------|--------|--------|-------|--------|-------|-------|-------|-------|
| 37.89 | 239.75 | 196.77 | 37.67 | 176.16 | 77.90 | 22.46 | 69.62 | 26.51 |
| 38.49 | 176.97 | 155.09 | 34.58 | 172.82 | 75.90 | 18.71 | 62.64 | 24.89 |
| 36.58 | 158.54 | 162.77 | 23.06 | 170.25 | 77.36 | 14.29 | 65.40 | 26.03 |
| 42.50 | 269.34 | 196.34 | 33.55 | 238.09 | 78.50 | 30.96 | 69.44 | 32.71 |
| 47.03 | 336.31 | 229.06 | 50.06 | 258.09 | 76.50 | 38.70 | 75.32 | 39.47 |
| 41.02 | 234.17 | 164.39 | 33.44 | 228.29 | 74.50 | 24.66 | 67.90 | 32.63 |
| 52.26 | 388.1  | 228.71 | 69.38 | 262.16 | 75.50 | 44.38 | 77.74 | 42.26 |
| 47.87 | 369.39 | 214.95 | 54.41 | 243.57 | 78.25 | 42.52 | 78.11 | 40.69 |
| 41.66 | 269    | 170.71 | 35.71 | 242.94 | 73.25 | 31.63 | 72.01 | 35.89 |
| 45.54 | 294.52 | 214.95 | 49.50 | 253.70 | 78.25 | 29.36 | 73.09 | 41.47 |
| 42.53 | 247.68 | 185.96 | 39.52 | 237.88 | 76.25 | 22.51 | 68.94 | 32.65 |
| 39.52 | 291.46 | 165.12 | 28.77 | 207.74 | 75.25 | 28.09 | 66.00 | 28.16 |
| 44.47 | 194.21 | 177.89 | 48.94 | 252.67 | 79.90 | 24.90 | 73.04 | 35.10 |
| 41.64 | 225.77 | 185.37 | 44.33 | 211.59 | 75.90 | 20.70 | 69.38 | 30.62 |
| 39.07 | 297.9  | 160.09 | 38.87 | 194.51 | 77.90 | 22.44 | 67.61 | 27.44 |
| 43.25 | 208.09 | 177.54 | 45.77 | 225.71 | 75.90 | 33.25 | 71.47 | 33.76 |
| 40.25 | 195.54 | 165.79 | 38.73 | 199.76 | 79.90 | 24.44 | 65.62 | 26.90 |
| 37.18 | 173.44 | 186.64 | 24.55 | 192.56 | 77.90 | 24.21 | 64.61 | 28.22 |
| 42.12 | 184.79 | 198.41 | 41.65 | 234.40 | 79.90 | 28.27 | 69.08 | 27.89 |
| 38.96 | 242.17 | 158.27 | 32.85 | 198.71 | 76.90 | 25.67 | 68.01 | 25.76 |
| 37.26 | 162.61 | 175.70 | 31.65 | 184.62 | 74.90 | 17.82 | 60.81 | 26.89 |
| 37.08 | 157.66 | 151.99 | 30.75 | 181.20 | 77.72 | 13.97 | 63.04 | 28.26 |
| 41.77 | 263.3  | 167.77 | 41.36 | 243.01 | 76.50 | 26.85 | 71.73 | 36.34 |
| 46.03 | 322.38 | 204.77 | 52.81 | 265.18 | 79.50 | 34.22 | 75.04 | 37.68 |
| 41.22 | 218.49 | 199.95 | 38.97 | 235.67 | 77.50 | 27.87 | 69.64 | 29.50 |
| 51.56 | 388.73 | 223.79 | 64.91 | 256.71 | 80.50 | 37.56 | 80.28 | 40.78 |
| 47.14 | 362.02 | 221.69 | 58.49 | 263.41 | 77.25 | 41.70 | 78.08 | 41.84 |
| 43.03 | 280.06 | 210.84 | 37.26 | 240.10 | 74.25 | 33.54 | 72.38 | 35.94 |
| 46.73 | 314.49 | 221.69 | 54.52 | 255.69 | 77.25 | 36.42 | 74.61 | 36.04 |
| 41.39 | 232.84 | 198.08 | 31.91 | 217.19 | 73.25 | 30.99 | 69.07 | 35.82 |
| 39.70 | 297.91 | 196.07 | 38.46 | 211.85 | 77.25 | 28.57 | 66.07 | 30.80 |
| 44.27 | 173.96 | 210.48 | 41.32 | 254.61 | 80.90 | 34.13 | 72.66 | 35.88 |
| 41.40 | 214.04 | 196.01 | 46.81 | 206.86 | 77.90 | 29.26 | 68.13 | 28.28 |
| 38.45 | 305.89 | 177.67 | 25.59 | 176.56 | 78.90 | 27.85 | 67.97 | 27.08 |
| 44.18 | 198.54 | 210.13 | 47.22 | 250.56 | 80.90 | 30.73 | 73.04 | 37.46 |
| 39.69 | 204.72 | 186.54 | 34.40 | 203.88 | 76.90 | 29.60 | 63.38 | 29.40 |
| 37.66 | 177.82 | 174.86 | 33.48 | 186.74 | 74.90 | 23.73 | 65.55 | 28.76 |
| 42.50 | 191.24 | 190.74 | 32.04 | 241.61 | 78.90 | 26.30 | 66.61 | 35.36 |
| 39.53 | 252.07 | 175.91 | 25.53 | 202.29 | 74.90 | 27.34 | 66.15 | 29.52 |
| 36.63 | 183.74 | 179.46 | 24.67 | 188.72 | 76.90 | 14.20 | 61.47 | 26.22 |
| 36.77 | 162.48 | 167.77 | 33.47 | 172.06 | 77.11 | 17.70 | 65.19 | 25.08 |
